# Supplementary material
Source: publisher figshare collection journal article supplement (https://acs.figshare.com/ndownloader/files/12329054)
Supplement: Supplementary file 1 [file 12329054]

## Supporting information

### **Photoresponsive micelle-incorporated doxorubicin for chemophotodynamic therapy to achieve synergistic antitumor effects**

*Da Hye Kim<sup>‡</sup>, Hee Sook Hwang<sup>‡</sup>, Kun Na<sup>\*</sup>*

<sup>‡</sup>Department of Biotechnology, The Catholic University of Korea, Bucheon-si, Gyeonggi do, 420-743, Republic of Korea

Correspondence should be addressed to: \*e-mail: [kna6997@catholic.ac.kr](mailto:kna6997@catholic.ac.kr)

## Supporting figures

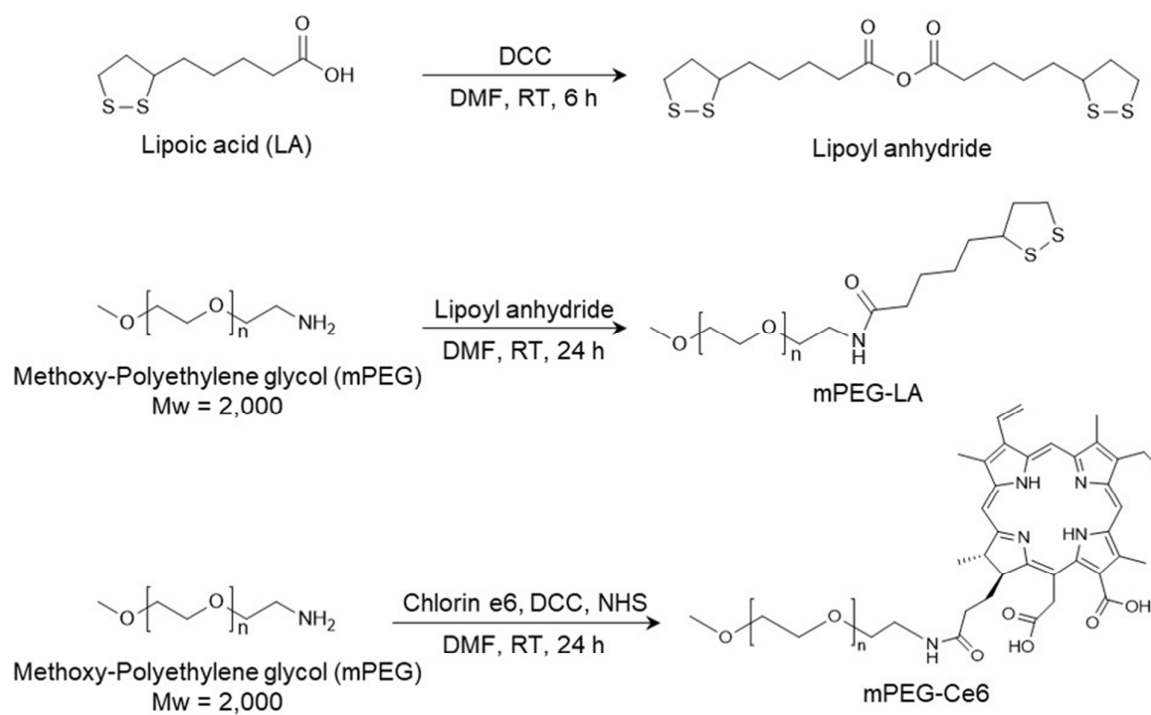

**Figure S1.** Synthesis method of mPEG-LA and mPEG-Ce6. DCC, Dicyclohexylcarbodiimide; DMF, N,N-Dimethyl formamide; NHS, N-hydroxysuccinimide; RT, Room temperature.

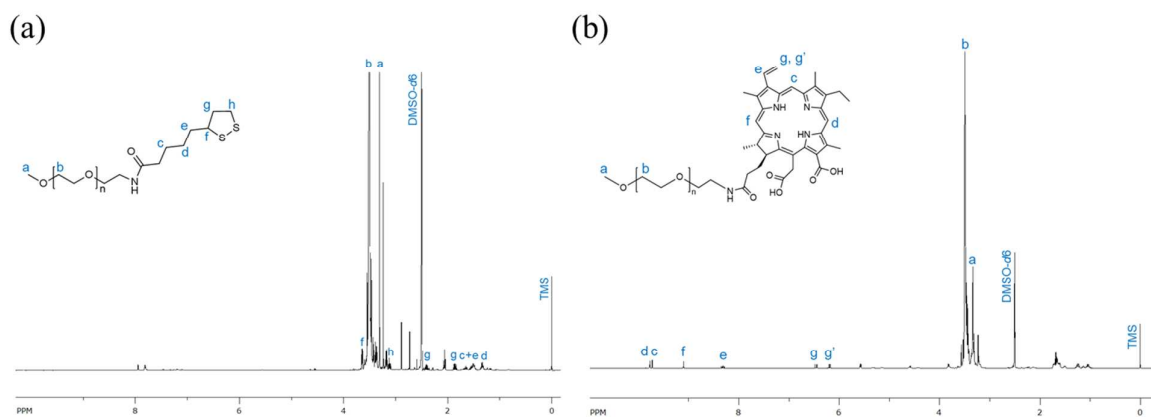

**Figure S2.**  $^1\text{H}$ -NMR analysis of (a) mPEG-LA and (b) mPEG-Ce6.

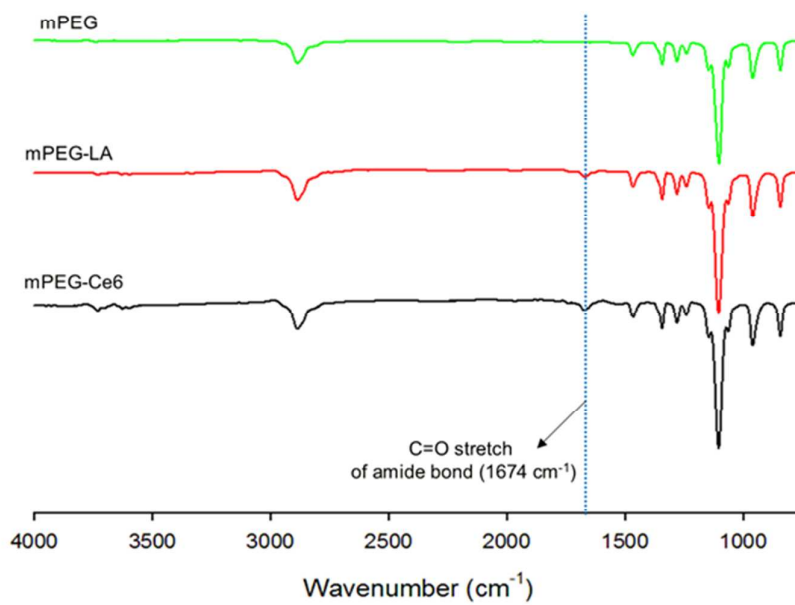

**Figure S3.** FT-IR spectra of mPEG, mPEG-LA and mPEG-Ce6. The blue line indicates C=O stretch of amide bond at  $1674\text{ cm}^{-1}$ .

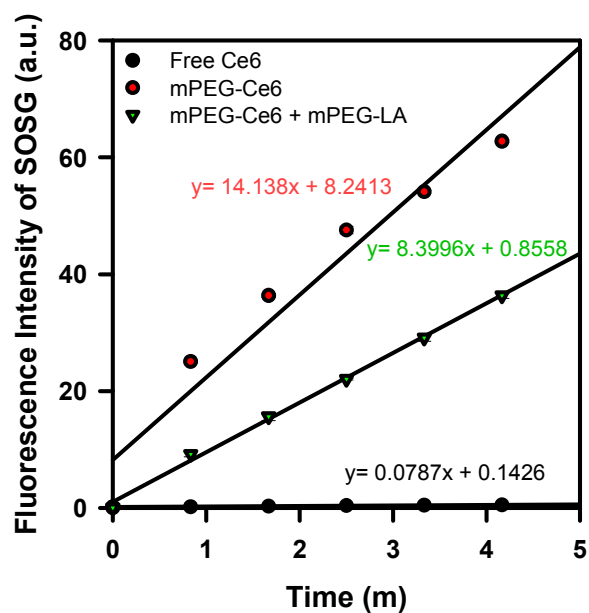

**Figure S4.** Comparison of the slope of singlet oxygen generation efficacy between mPEG-Ce6 and mixture of mPEG-Ce6 and mPEG-LA.

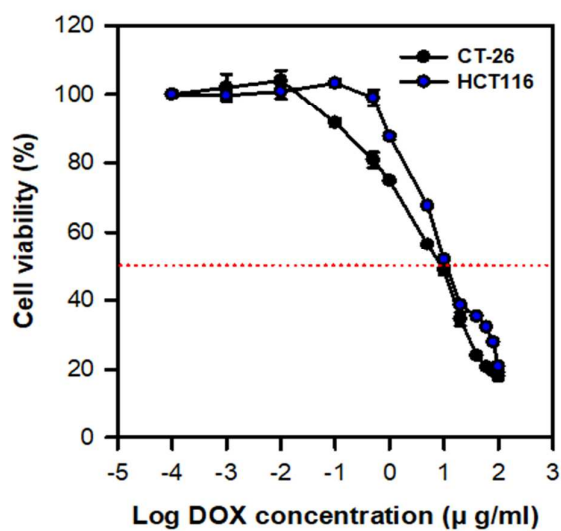

**Figure S5.** IC<sub>50</sub> of Doxorubicin against CT-26 and HCT-116 cells for 48 h.

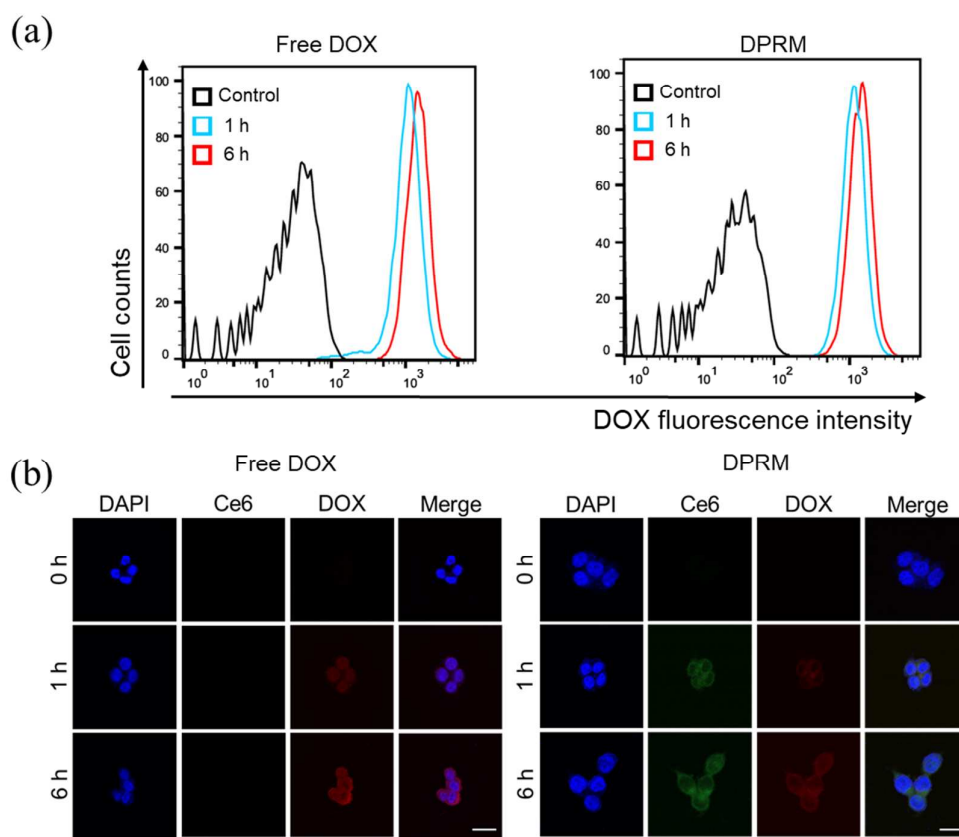

**Figure S6.** *In vitro* cellular uptake efficacy in HCT-116 cells. (a) Flow cytometry analysis after incubation with free DOX (left) and DPRMs (right) for 1 h or 6 h (Dose of DOX, Dose of Ce6). (b) Confocal laser scanning microscopy images after free DOX (left) and DPRMs (right) incubation for 1 h or 6 h. For each panel, images show DOX fluorescence (red), Ce6 fluorescence (green) in cells, cell nuclei are stained by DAPI (blue), and overlays of three images. The scale bar is 20  $\mu\text{m}$ .

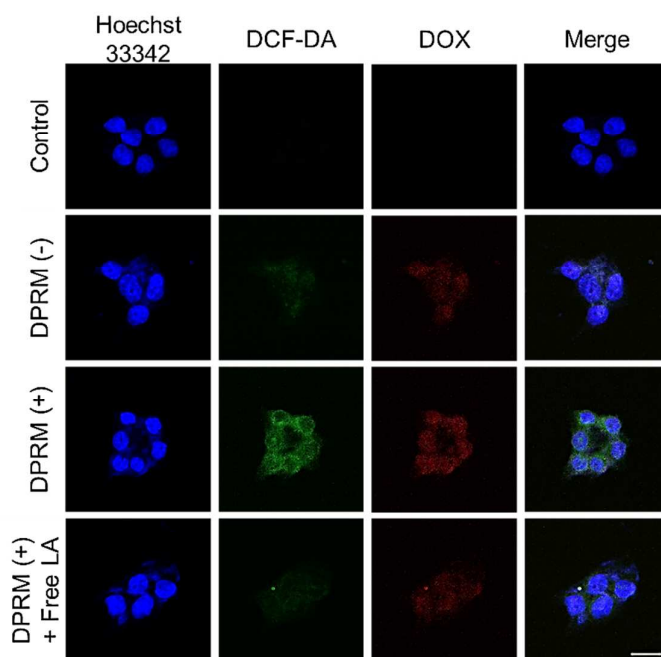

**Figure S7.** *In vitro* reactive oxygen species (ROS) generation efficacy and DOX release behavior of DPRMs in HCT-116 cells using DCF-DA staining. Confocal laser scanning microscopy images after 4 h incubation of DPRMs (1  $\mu\text{g/mL}$  DOX, 1.5  $\mu\text{g/mL}$  Ce6) with or without laser irradiation of 0.2  $\text{J/cm}^2$ . The irradiation power of the 671 nm light was 20  $\text{mW/cm}^2$ . The scale bar is 20  $\mu\text{m}$ . Concentration of free lipoic acid was  $5 \times 10^{-3}$  M in medium.

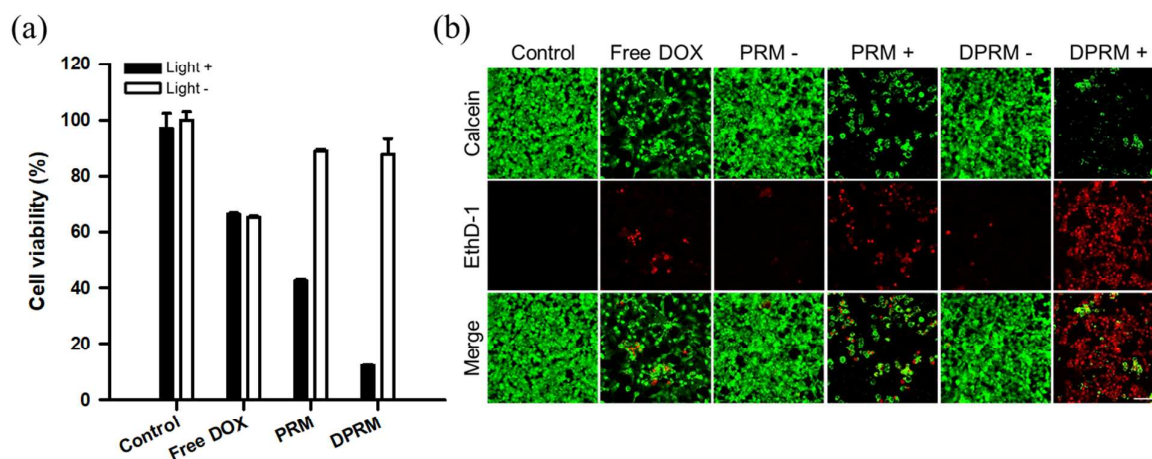

**Figure S8.** *In vitro* cytotoxicity assay of HCT-116 cells. (a) MTT assay after treatment free DOX, PRMs and DPRMs (5  $\mu\text{g/mL}$  DOX, 7.5  $\mu\text{g/mL}$  Ce6) in the absence and presence of laser irradiation of 0.6  $\text{J/cm}^2$  (6.0  $\text{mW/cm}^2$ , 100 sec). Data are expressed as mean  $\pm$  standard deviation (SD) ( $n = 3$ ). (b) Live & Dead assay after treatment free DOX, PRMs and DPRMs (5  $\mu\text{g/mL}$  DOX, 7.5  $\mu\text{g/mL}$  Ce6) in the absence and presence of laser irradiation of 0.6  $\text{J/cm}^2$ . In each panel, the green and red fluorescence indicate live and dead cells, respectively. The scale bar is 100  $\mu\text{m}$ .
